# Supplementary material
Source: PubMed Central journal article supplement (PMC5936479)
Supplement: NIHMS959443-supplement-216_2018_1034_MOESM1_ESM.pdf [file NIHMS959443-supplement-216_2018_1034_MOESM1_ESM.pdf]

**Analytical and Bioanalytical Chemistry**

**Electronic Supplementary Material**

**Simple and Inexpensive Micromachined Aluminum Microfluidic Devices for  
Acoustic Focusing of Particles and Cells**

Gayatri P. Gautam, Tobias Burger, Andrew Wilcox, Michael J. Cumbo, Steven W. Graves,  
Menake E. Piyasena

Additional files available under [10.1007/s00216-018-1034-6](https://doi.org/10.1007/s00216-018-1034-6)

**Content**

- (1). Movie S1: Focusing of polystyrene particles in AI-device (see separate file)
- (2). Movie S2: Acoustic focusing of Nile red stained bovine RBC in AI-device (see separate file)
- (3). Movie S3: Acoustic focusing of Nile red stained Jurkat cells in AI-device (see separate file)
- (4). Movie S4: Multi node acoustic focusing of polystyrene particles in AI-device (see separate file)
- (5). Figure S1: Flow Cytometry scatter plots demonstrating the acoustic focusing of 10.2  $\mu\text{m}$  Nile red particles
- (6). Figure S2: Epi-fluorescence micrograph showing the acoustic focusing of Nile red stained Jurkat cells in AI-device

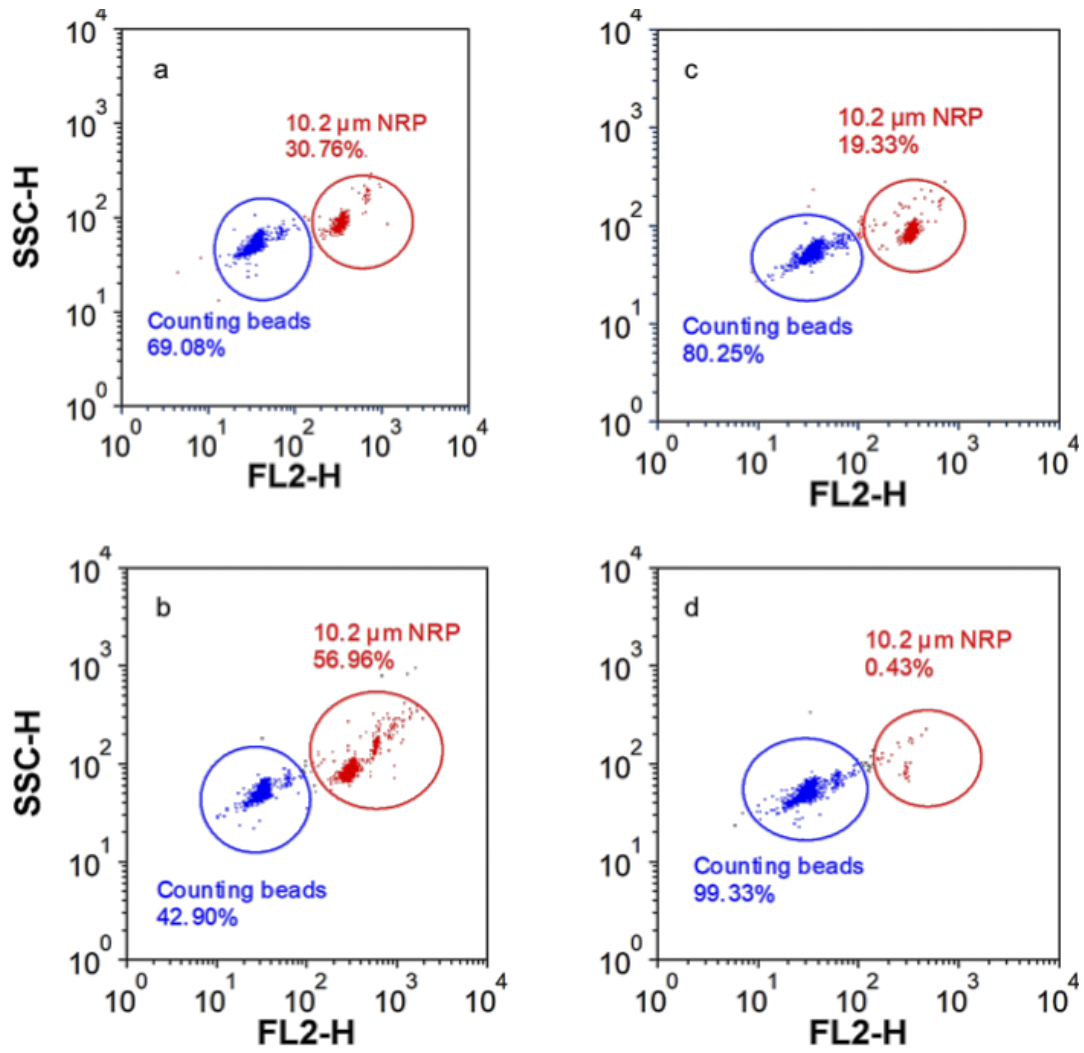

**Fig. S1** Flow Cytometry scatter plots demonstrating the acoustic focusing of 10.2 μm Nile red particles.

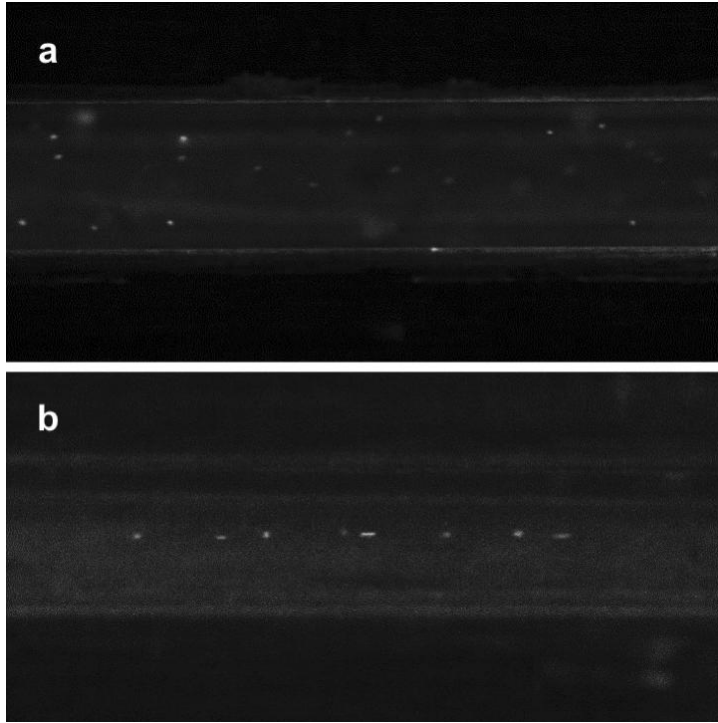

**Fig. S2** Epi-fluorescence micrograph showing the acoustic focusing of Nile red stained Jurkat cells in AI-device
